# Supplementary material
Source: MDPI journal article supplement (https://www.mdpi.com/2312-7481/9/2/36)
Supplement: s1 [file s1]

# SUPPLEMENTARY INFORMATION

## FOR THE MANUSCRIPT

### Single-molecule magnets based on heteroleptic terbium(III) trisphthalocyaninate in solvent-free and solvent-containing forms

Maxim A. Faraonov <sup>1</sup>, Alexander G. Martynov <sup>2</sup>, Marina A. Polovkova <sup>2</sup>, Salavat S. Khasanov <sup>3</sup>, Yulia G. Gorbunova <sup>2,4</sup>, Aslan Yu. Tsivadze <sup>2,4</sup>, Akihiro Otsuka <sup>5</sup>, Hideki Yamochi <sup>5</sup>, Hiroshi Kitagawa <sup>5</sup>, Dmitri V. Konarev <sup>1,\*</sup>

<sup>1</sup> Federal Research Center of Problems of Chemical Physics and Medicinal Chemistry RAS, Chernogolovka, Moscow region, 142432 Russia; E-mail: konarev3@yandex.ru

<sup>2</sup> A.N. Frumkin Institute of Physical Chemistry and Electrochemistry, Russian Academy of Sciences, Leninskii pr., 31, Bldg. 4, Moscow, 119071, Russia

<sup>3</sup> Institute of Solid State Physics RAS, Chernogolovka, Moscow region, 142432 Russia.

<sup>4</sup> N.S. Kurnakov Institute of General and Inorganic Chemistry, Russian Academy of Sciences, Leninskii pr., 31, Moscow, 119991, Russia

<sup>5</sup> Division of Chemistry, Graduate School of Science, Kyoto University, Sakyo-ku, Kyoto 606-8502, Japan

|                                                                                                                                                                                                                                                                                                                                                                                             |          |
|---------------------------------------------------------------------------------------------------------------------------------------------------------------------------------------------------------------------------------------------------------------------------------------------------------------------------------------------------------------------------------------------|----------|
| <b>Spectral and structural characteristics of (Pc)Tb[(15C5)<sub>4</sub>Pc]Tb(Pc) .....</b>                                                                                                                                                                                                                                                                                                  | <b>3</b> |
| <b>Figure S1.</b> Powder diffraction pattern of the compound (Pc)Tb[(15C5) <sub>4</sub> Pc]Tb(Pc) ( <b>1</b> ) (blue curve) taken in Bragg-Brentano scheme for flat packed sample using SmartLab diffractometer with CuKα radiation. Black curve shows powder diffraction pattern of the compound (Pc)Sm[(15C5) <sub>4</sub> Pc]Sm(Pc)·8CHCl <sub>3</sub> generated from its CIF file. .... | 3        |
| <b>Figure S2.</b> IR-spectrum of (Pc)Tb[(15C5) <sub>4</sub> Pc]Tb(Pc)·6C <sub>6</sub> H <sub>4</sub> Cl <sub>2</sub> <b>2</b> measured in KBr pellet prepared in anaerobic conditions. ....                                                                                                                                                                                                 | 4        |
| <b>Figure S3.</b> UV-visible-NIR spectrum of (Pc)Tb[(15C5) <sub>4</sub> Pc]Tb(Pc)·6C <sub>6</sub> H <sub>4</sub> Cl <sub>2</sub> <b>2</b> in the 220-1800 nm range. Spectrum is measured in KBr pellet prepared in anaerobic conditions.....                                                                                                                                                | 5        |
| <b>Figure S4.</b> View on two chains from the (Pc)Tb[(15C5) <sub>4</sub> Pc]Tb(Pc) molecules in <b>2</b> arranged along the <i>a</i> axis and having van der Waals contacts between two 15-crown-5 fragments. Phthalocyanine planes in two neighboring chains are positioned at an angle of 59.6°. ....                                                                                     | 6        |

|                                                                                                                                                                                                                                                                                                                                                  |    |
|--------------------------------------------------------------------------------------------------------------------------------------------------------------------------------------------------------------------------------------------------------------------------------------------------------------------------------------------------|----|
| <b>Figure S5.</b> Surrounding of one (Pc)Tb[(15C5) <sub>4</sub> Pc]Tb(Pc) molecule by 14 solvent <i>o</i> -dichlorobenzene molecules in the crystal structure of <b>2</b> . One most occupied orientation only is shown for one of three solvent molecules which is disordered between three orientations. ....                                  | 7  |
| <b>Data of magnetic measurements for the powdered sample of 1</b> .....                                                                                                                                                                                                                                                                          | 8  |
| <b>Figure S6.</b> Temperature dependence of molar magnetic susceptibility for powdered sample of (Pc)Tb[(15C5) <sub>4</sub> Pc]Tb(Pc) <b>1</b> measured in 1 kOe magnetic field after subtraction of the temperature independent part. ....                                                                                                      | 8  |
| <b>Figure S7.</b> Temperature dependence of molar magnetic susceptibility in zero-field (ZF, red curve) and field cooling conditions (FC, blue curve) for the powdered sample of (Pc)Tb[(15C5) <sub>4</sub> Pc]Tb(Pc) <b>1</b> . Splitting between two curves is observed below ~6 K. ....                                                       | 9  |
| <b>Figure S8.</b> Temperature dependence of reciprocal molar magnetic susceptibility of <b>1</b> allowing to determine Weiss temperature of +1.5 K. ....                                                                                                                                                                                         | 10 |
| <b>Figure S9.</b> Dependence of magnetization <i>vs</i> magnetic field up to 50 kOe at 2K (black line is a guide to the eye) for the powdered sample of (Pc)Tb[(15C5) <sub>4</sub> Pc]Tb(Pc) <b>1</b> .....                                                                                                                                      | 11 |
| <b>Figure S10.</b> Hysteresis loop at 2K observed in magnetic field between -50 and 50 kOe for the powdered sample of (Pc)Tb[(15C5) <sub>4</sub> Pc]Tb(Pc) <b>1</b> . ....                                                                                                                                                                       | 12 |
| <b>Figure S11.</b> Frequency dependence of: (a) in-phase ( $\chi'$ ) and (b) out-of-phase ( $\chi''$ ) ac magnetic susceptibility of powdered sample of (Pc)Tb[(15C5) <sub>4</sub> Pc]Tb(Pc) <b>1</b> . Solid lines represent the fit of the data by the generalized Debye model. ....                                                           | 13 |
| <b>Data of magnetic measurements for the polycrystalline sample of 2</b> .....                                                                                                                                                                                                                                                                   | 14 |
| <b>Figure S12.</b> Temperature dependence of molar magnetic susceptibility for polycrystalline sample of (Pc)Tb[(15C5) <sub>4</sub> Pc]Tb(Pc)·6C <sub>6</sub> H <sub>4</sub> Cl <sub>2</sub> ( <b>2</b> ) measured in 1 kOe magnetic field after subtraction of the temperature independent part. ....                                           | 14 |
| <b>Figure S13.</b> Temperature dependence of molar magnetic susceptibility in zero-field (ZF, red curve) and field cooling conditions (FC, blue curve) for polycrystalline sample of (Pc)Tb[(15C5) <sub>4</sub> Pc]Tb(Pc)·6C <sub>6</sub> H <sub>4</sub> Cl <sub>2</sub> ( <b>2</b> ). Splitting between two curves is observed below ~6 K. .... | 15 |
| <b>Figure S14.</b> Temperature dependence of reciprocal molar magnetic susceptibility of <b>2</b> allowing to determine Weiss temperature of +1.7 K.....                                                                                                                                                                                         | 16 |
| <b>Figure S15.</b> Frequency dependence of: (a) in-phase ( $\chi'$ ) and (b) out-of-phase ( $\chi''$ ) ac magnetic susceptibility of polycrystalline sample of <b>2</b> . Solid lines represent the fit of the data by the generalized Debye model. ....                                                                                         | 17 |

## Spectral and structural characteristics of (Pc)Tb[(15C5)<sub>4</sub>Pc]Tb(Pc)

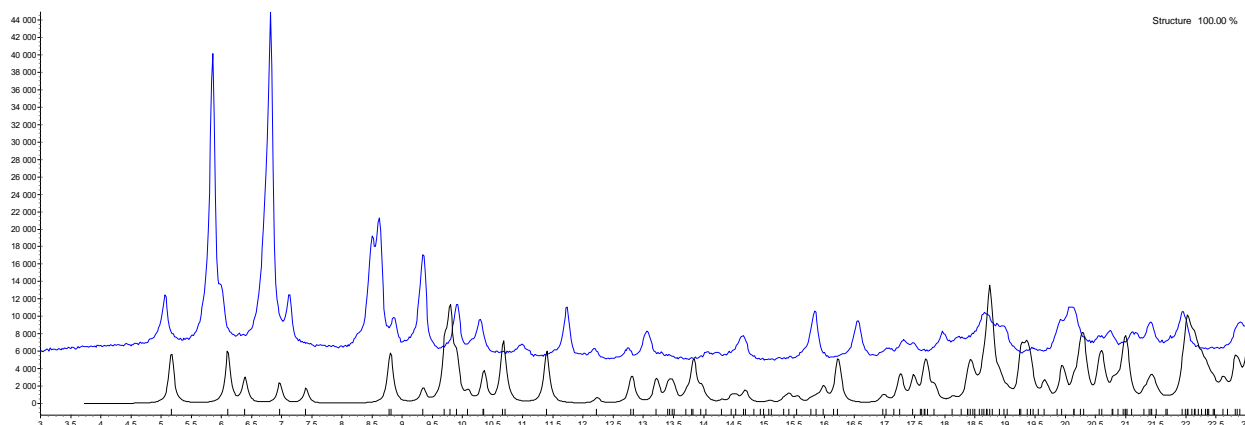

**Figure S1.** Powder diffraction pattern of the compound (Pc)Tb[(15C5)<sub>4</sub>Pc]Tb(Pc) (**1**) (blue curve) taken in Bragg-Brentano scheme for flat packed sample using SmartLab diffractometer with CuK $\alpha$  radiation. Black curve shows powder diffraction pattern of the compound (Pc)Sm[(15C5)<sub>4</sub>Pc]Sm(Pc)·8CHCl<sub>3</sub> generated from its CIF file.

Indexing of powder diffraction spectrum of **1** (Fig.S5) gives as possible solution the following lattice parameters:

$$a = 13.037, b = 15.323, c = 38.456 \text{ \AA}, \alpha = 102.80, \beta = 109.70, \gamma = 96.36^\circ, V = 6907.5 \text{ \AA}^3.$$

These parameters are close to those for the double unit cell of the known crystal structure of (Pc)Sm[(15C5)<sub>4</sub>Pc]Sm(Pc)·8CHCl<sub>3</sub> [Martynov, A. G.; Zubareva, O. V.; Gorbunova, Y. G.; Sakharov, S. G.; Nefedov, S. E.; Dolgushin, F. M.; Tsivadze, A. Y. Diphthalocyaninatolanthanum as a New Phthalocyaninato-Dianion Donor for the Synthesis of Heteroleptic Triple-Decker Rare Earth Element Crown-Phthalocyaninato Complexes. *Eur. J. Inorg. Chem.* **2007**, 4800–4807, doi:10.1002/ejic.200700489].

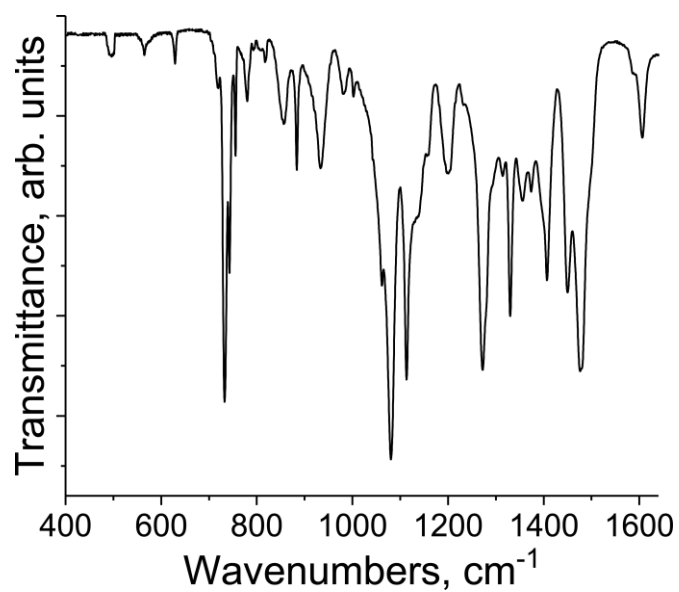

**Figure S2.** IR-spectrum of (Pc)Tb[(15C5)<sub>4</sub>Pc]Tb(Pc)·6C<sub>6</sub>H<sub>4</sub>Cl<sub>2</sub> **2** measured in KBr pellet prepared in anaerobic conditions.

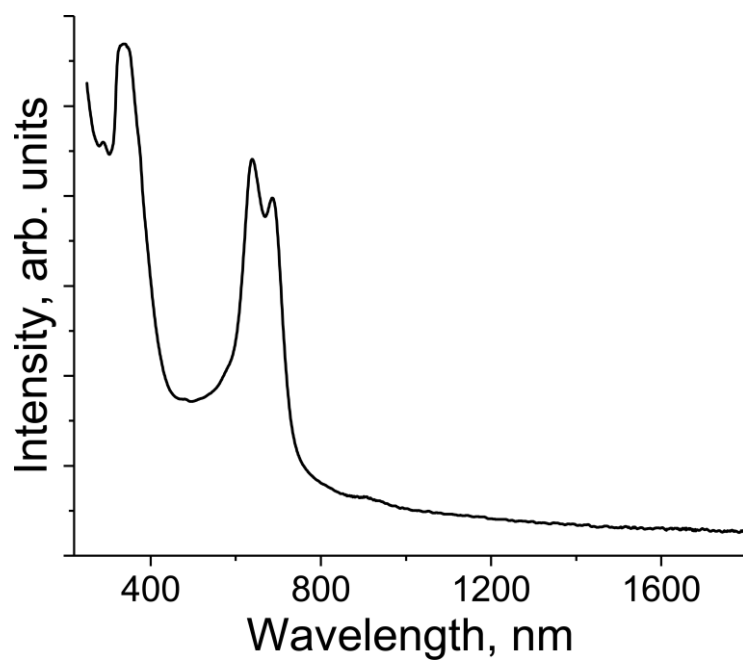

**Figure S3.** UV-visible-NIR spectrum of (Pc)Tb[(15C5)<sub>4</sub>Pc]Tb(Pc)·6C<sub>6</sub>H<sub>4</sub>Cl<sub>2</sub> **2** in the 220-1800 nm range. Spectrum is measured in KBr pellet prepared in anaerobic conditions.

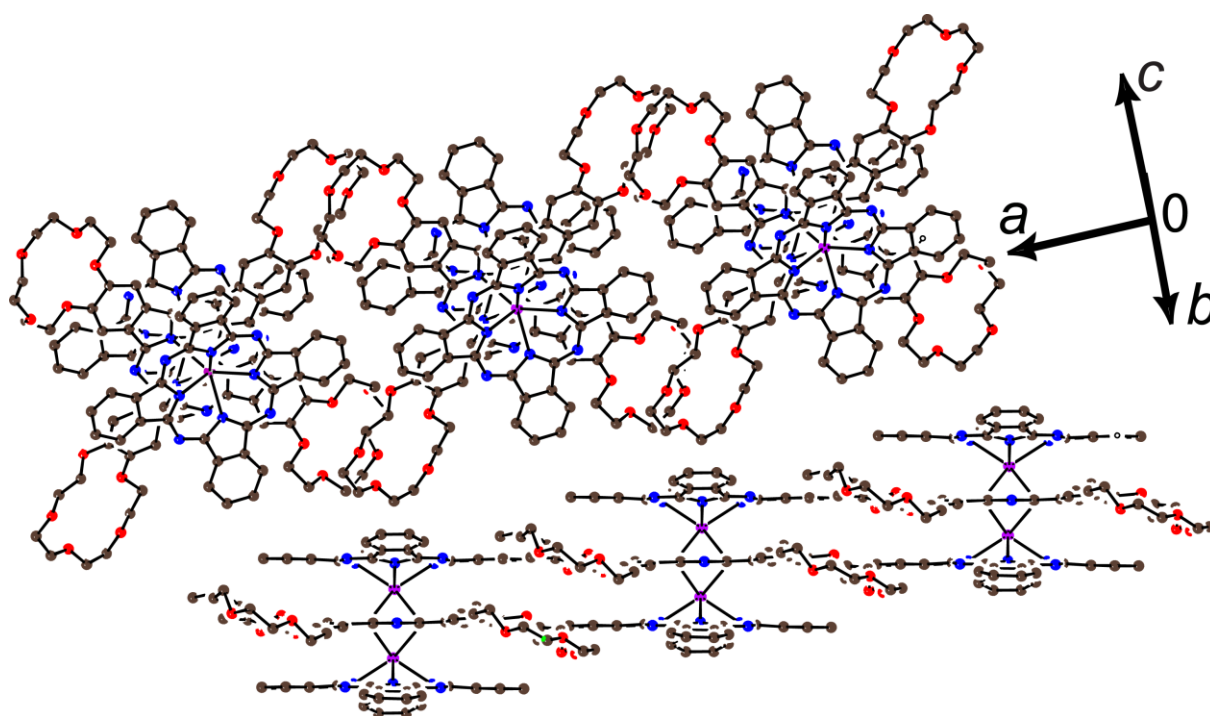

**Figure S4.** View on two chains from the  $(\text{Pc})\text{Tb}[(15\text{C}5)_4\text{Pc}]\text{Tb}(\text{Pc})$  molecules in **2** arranged along the *a* axis and having van der Waals contacts between two 15-crown-5 fragments. Phthalocyanine planes in two neighboring chains are positioned at an angle of  $59.6^\circ$ .

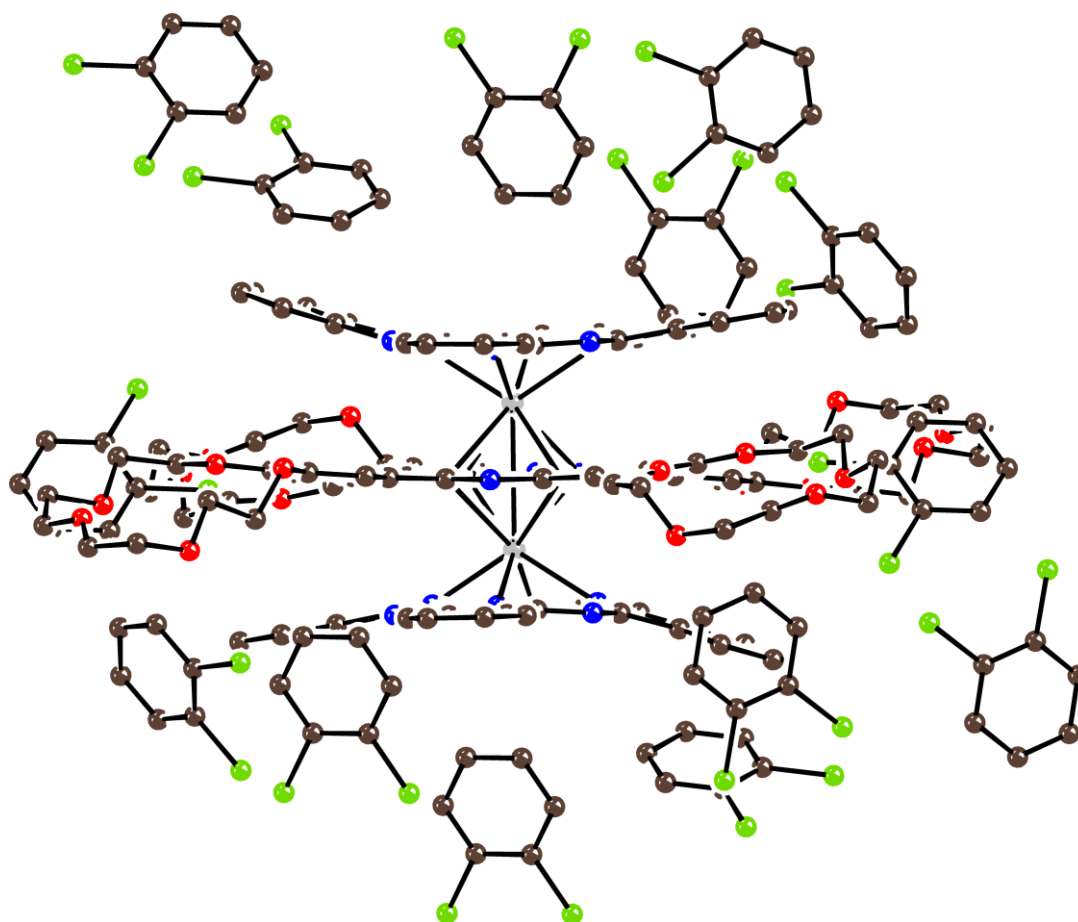

**Figure S5.** Surrounding of one (Pc)Tb[(15C5)<sub>4</sub>Pc]Tb(Pc) molecule by 14 solvent *o*-dichlorobenzene molecules in the crystal structure of **2**. One most occupied orientation only is shown for one of three solvent molecules which is disordered between three orientations.

Data of magnetic measurements for the powdered sample of **1**

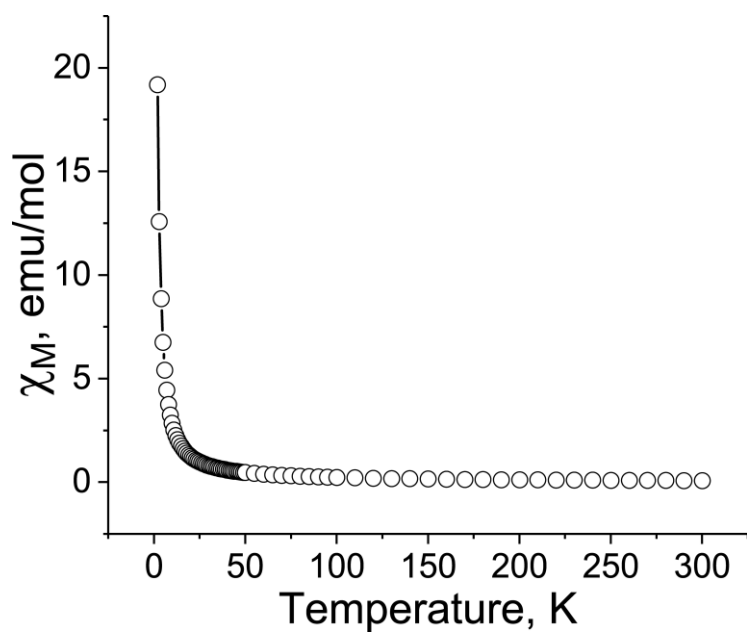

**Figure S6.** Temperature dependence of molar magnetic susceptibility for powdered sample of (Pc)Tb[(15C5)<sub>4</sub>Pc]Tb(Pc) **1** measured in 1 kOe magnetic field after subtraction of the temperature independent part.



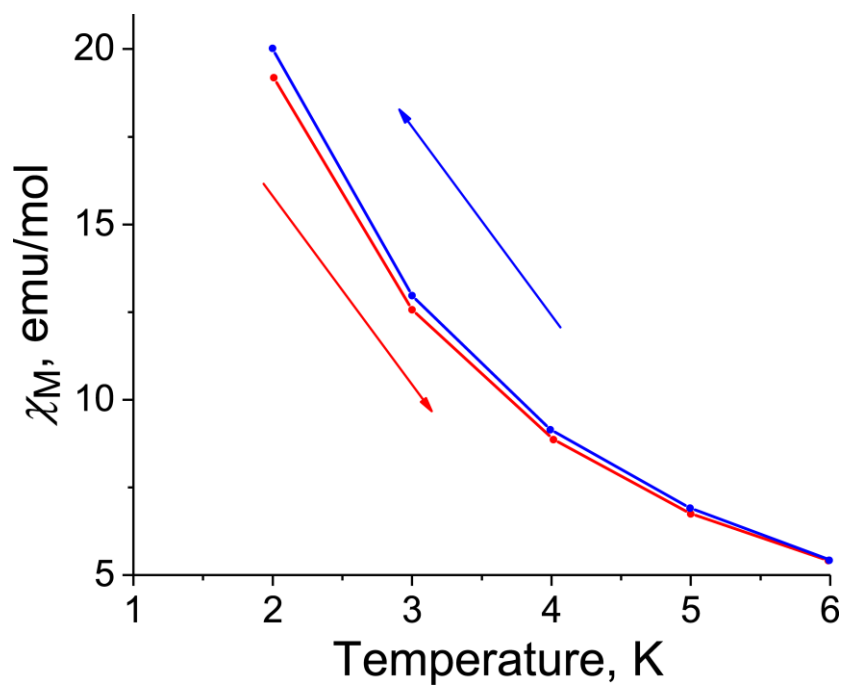

**Figure S7.** Temperature dependence of molar magnetic susceptibility in zero-field (ZF, red curve) and field cooling conditions (FC, blue curve) for the powdered sample of (Pc)Tb[(15C5)<sub>4</sub>Pc]Tb(Pc) **1**. Splitting between two curves is observed below ~6 K.

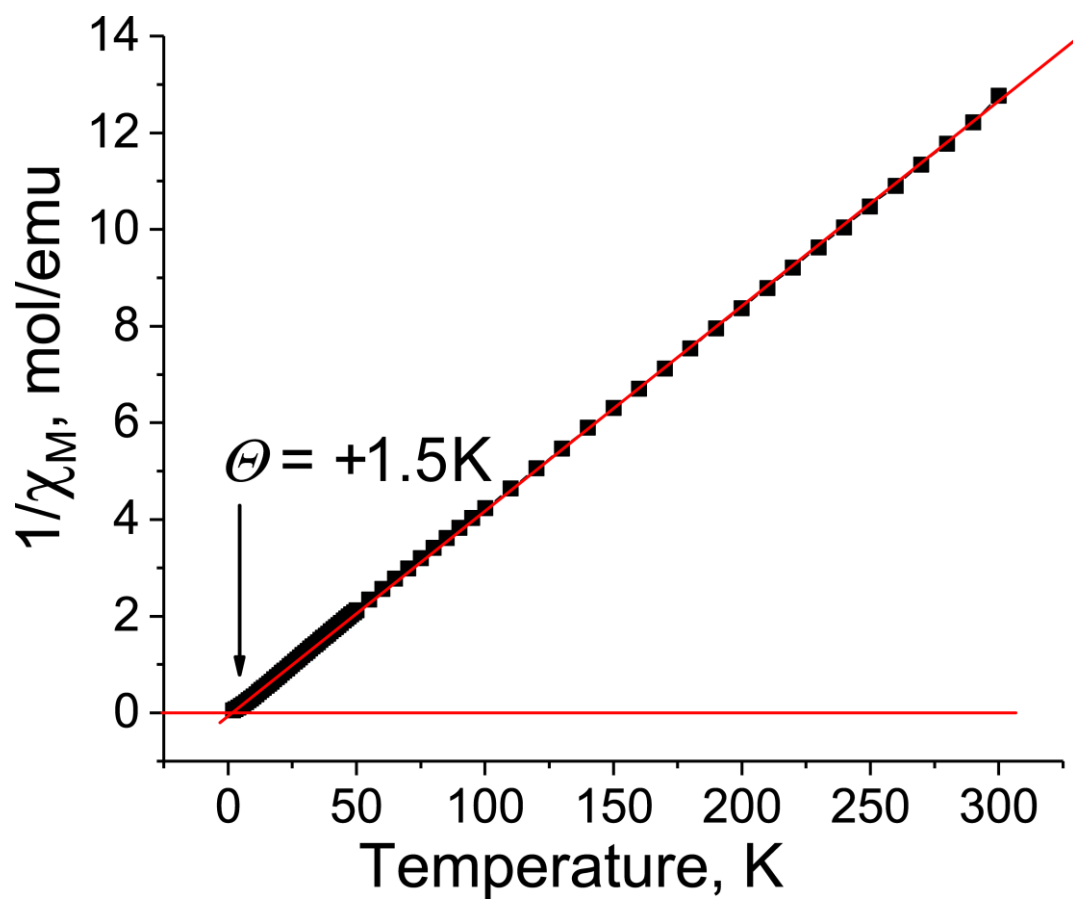

**Figure S8.** Temperature dependence of reciprocal molar magnetic susceptibility of **1** allowing to determine Weiss temperature of +1.5 K.

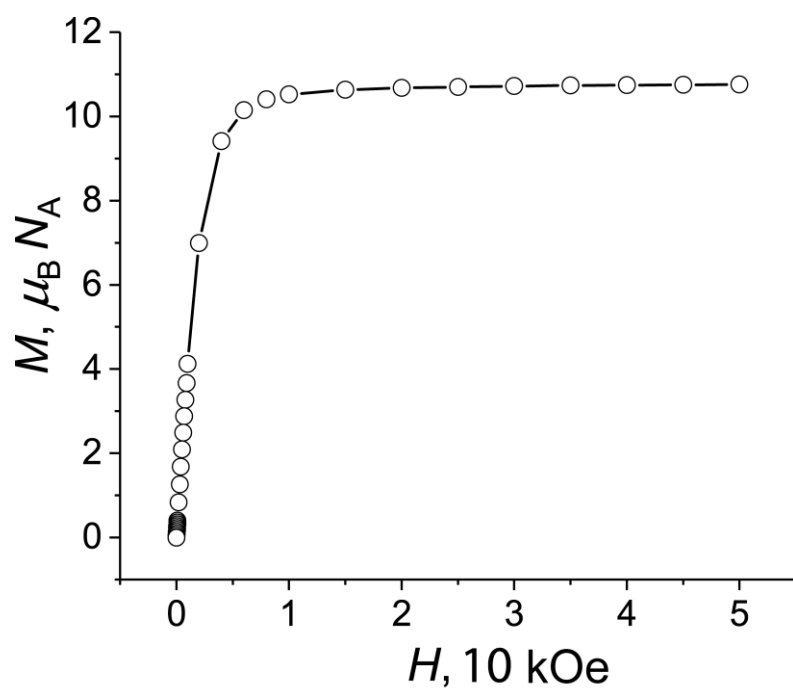

**Figure S9.** Dependence of magnetization *vs* magnetic field up to 50 kOe at 2K (black line is a guide to the eye) for the powdered sample of (Pc)Tb[(15C5)<sub>4</sub>Pc]Tb(Pc) **1**.

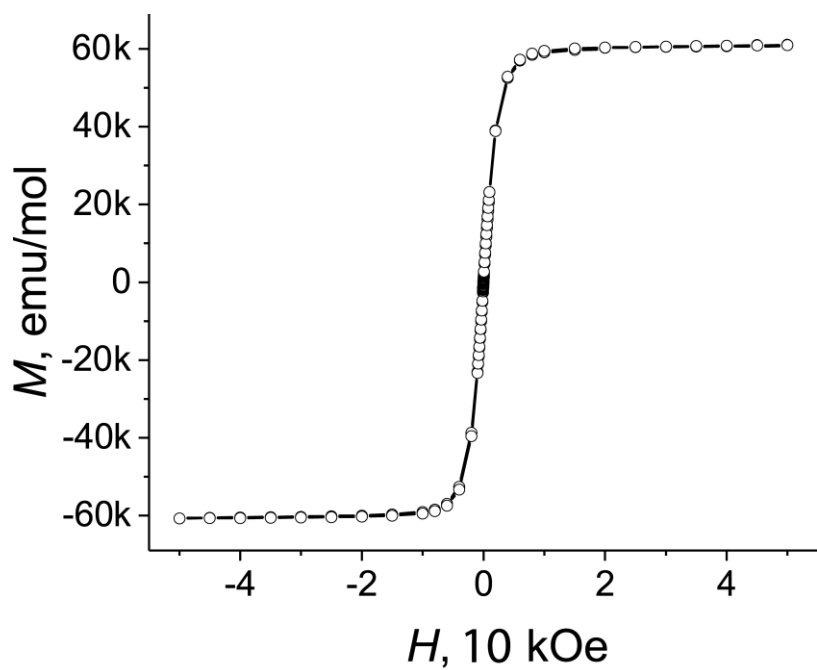

**Figure S10.** Hysteresis loop at 2K observed in magnetic field between -50 and 50 kOe for the powdered sample of (Pc)Tb[(15C5)<sub>4</sub>Pc]Tb(Pc) **1**.

Hysteresis can be resolved between -1 - and 1 kOe (see manuscript) and is not resolved in this figure.

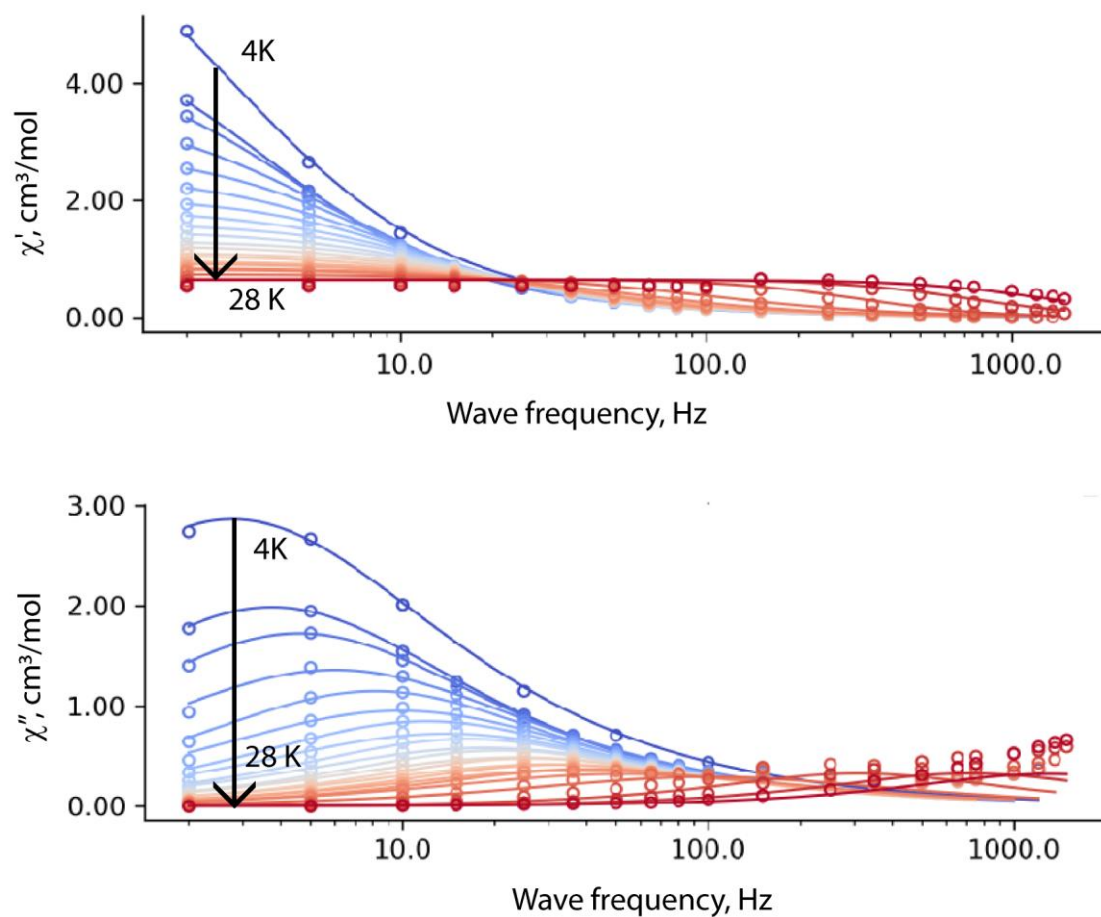

**Figure S11.** Frequency dependence of: (a) in-phase ( $\chi'$ ) and (b) out-of-phase ( $\chi''$ ) ac magnetic susceptibility of powdered sample of (Pc)Tb[(15C5)<sub>4</sub>Pc]Tb(Pc) **1**. Solid lines represent the fit of the data by the generalized Debye model.

Data of magnetic measurements for the polycrystalline sample of **2**

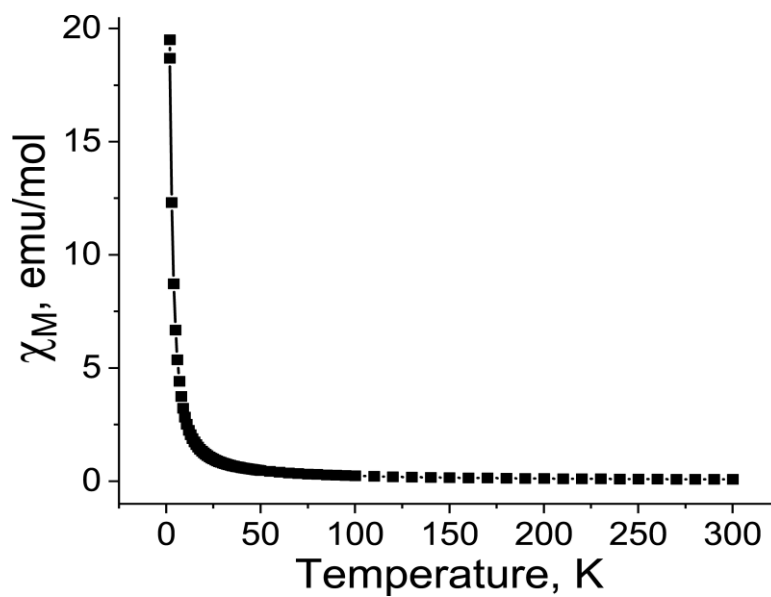

**Figure S12.** Temperature dependence of molar magnetic susceptibility for polycrystalline sample of (Pc)Tb[(15C5)<sub>4</sub>Pc]Tb(Pc)·6C<sub>6</sub>H<sub>4</sub>Cl<sub>2</sub> (**2**) measured in 1 kOe magnetic field after subtraction of the temperature independent part.

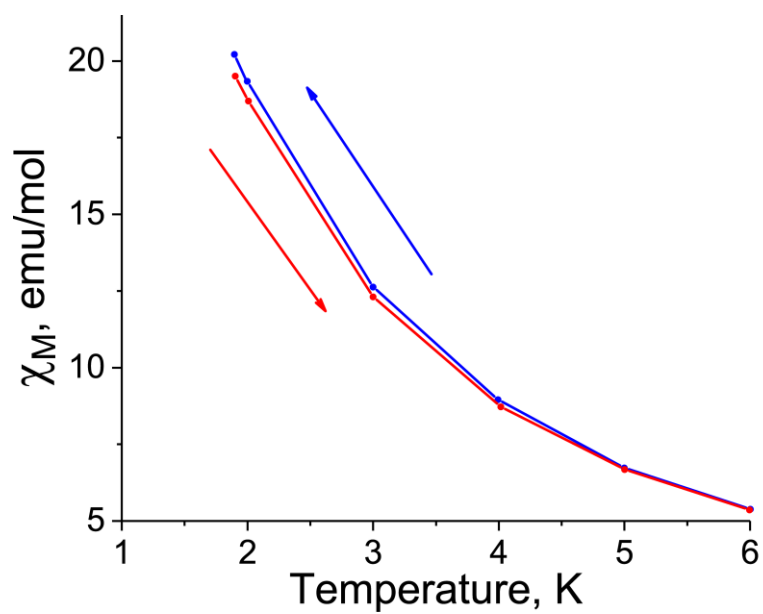

**Figure S13.** Temperature dependence of molar magnetic susceptibility in zero-field (ZF, red curve) and field cooling conditions (FC, blue curve) for polycrystalline sample of (Pc)Tb[(15C5)<sub>4</sub>Pc]Tb(Pc)·6C<sub>6</sub>H<sub>4</sub>Cl<sub>2</sub> (**2**). Splitting between two curves is observed below ~6 K.

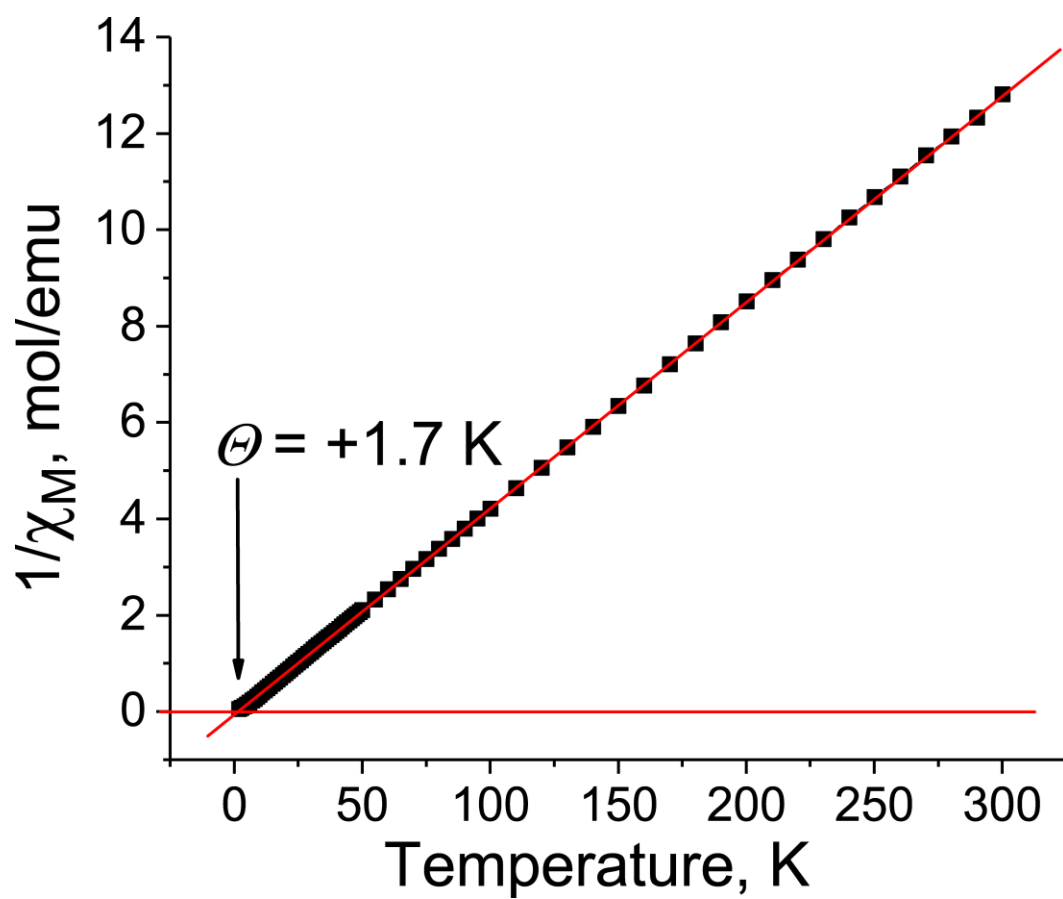

**Figure S14.** Temperature dependence of reciprocal molar magnetic susceptibility of **2** allowing to determine Weiss temperature of +1.7 K.



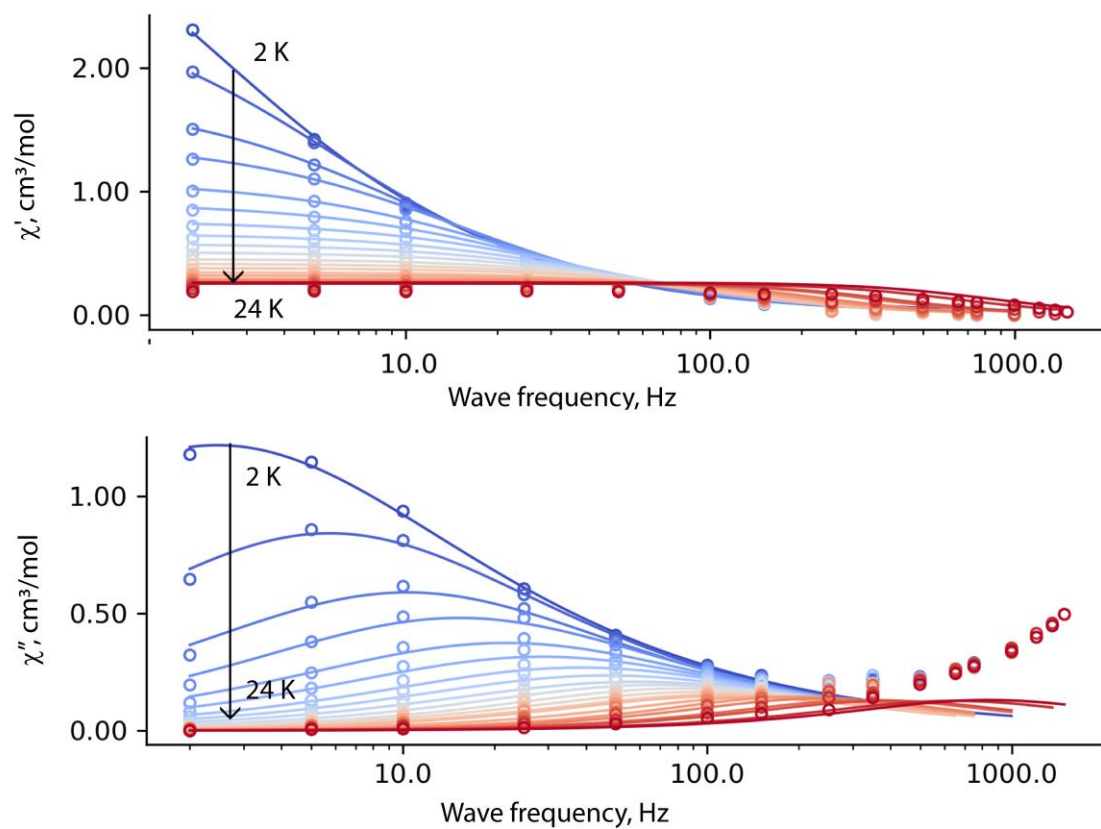

**Figure S15.** Frequency dependence of: (a) in-phase ( $\chi'$ ) and (b) out-of-phase ( $\chi''$ ) ac magnetic susceptibility of polycrystalline sample of **2**. Solid lines represent the fit of the data by the generalized Debye model.
