# Supplementary material
Source: MDPI journal article supplement (https://www.mdpi.com/2312-7481/9/2/36)
Supplement: s1 [file s1]

Archive with 1 entries (1 files):
- magnetochemistry-2162050-supplementary.pdf
